# Supplementary material
Source: PubMed Central journal article supplement (PMC6626679)

**SUPPLEMENTAL MATERIAL**

**Figure S1. Bubble plot with meta-regression line for the proportion of TB in the general population or DM patients only across time.** Analysis from the same studies showed in Figure 2 and reported by Root in 1934. Circles are sized according to the precision of each estimate with larger bubbles for more precise estimates. Regression formulas are shown.

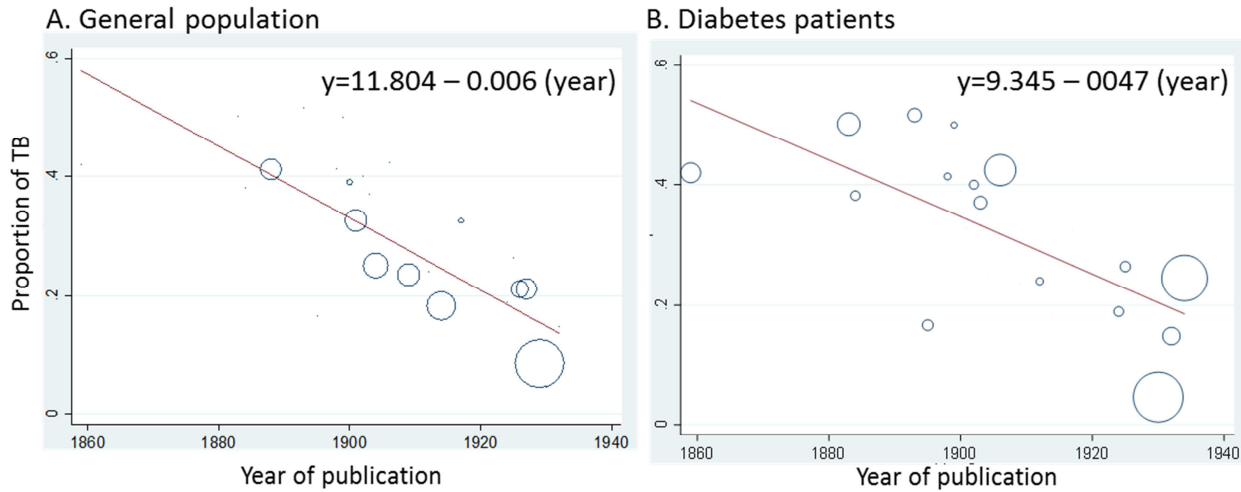

**Figure S2. Distribution of patients with TB and DM patients, by age groups.** The proportion of TB patients is shown by age group among the DM patients diagnosed with various forms of TB by radiological methods. Details on the methods from the two studies is provided in the text and Table 1.

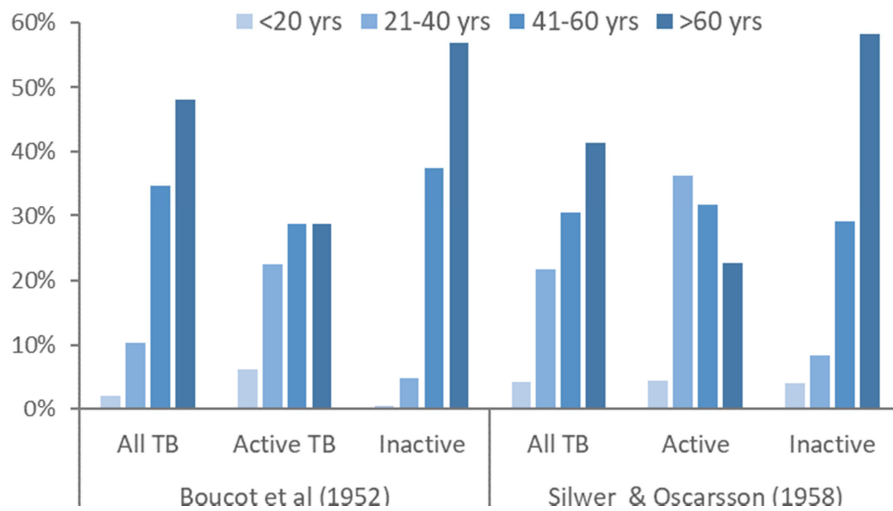

Supplement: NIHMS1528527-supplement-1.pdf [file NIHMS1528527-supplement-1.pdf]
